# Supplementary material for: Copper(ii)l/d-valine-(1,10-phen) complexes target human telomeric G-quadruplex motifs and promote site-specific DNA cleavage and cellular cytotoxicity
Source: Royal Society of Chemistry journal article supplement (doi:10.1039/d0dt01527j), 2020-01-01
Supplement: d0dt01527j1.pdf [file d0dt01527j1.pdf]

## Copper(II) L/D-valine-(1,10-phen) Complexes Target Telomeric G-quadruplex Motifs and Promote Site-Specific DNA Cleavage and Cellular Cytotoxicity

Farukh Arjmand,<sup>a,\*</sup> Surbhi Sharma,<sup>a</sup> Sabiha Parveen,<sup>a</sup> Loic Toupet,<sup>b</sup> Zhen Yu,<sup>c</sup> and J. A. Cowan<sup>c</sup>

<sup>a</sup> Department of Chemistry, Aligarh Muslim University, Aligarh 202002, India.

<sup>b</sup> Institut de Physique de sRennes, UMR 625, Université de Rennes 1, Campus de Beaulieu Bat. 11 A, 263 av. Général Leclerc, 35042 Rennes Cedex, France.

<sup>c</sup> Department of Chemistry and Biochemistry, The Ohio State University 100 West 18<sup>th</sup> Avenue, Columbus, OH 43210 (USA).

\* Corresponding Author: Farukh Arjmand, E-mail: [farukh.arjmand18@gmail.com](mailto:farukh.arjmand18@gmail.com) Tel:+91 5712703893.

**Table S1.** Selected bond lengths for complex **1a**.

| <b>Bond lengths</b> | <b>(Å)</b> |
|---------------------|------------|
| Cu(1)-N(1)          | 2.010      |
| Cu(1)-N(3)          | 1.989      |
| Cu(1)-N(2)          | 2.019      |
| Cu(1)-N(1)          | 2.010      |
| Cu(1)-O(1)          | 1.930      |
| Cu(1)-O(1W)         | 2.246      |

**Table S2.** Selected bond angles for complex **1a**.

| <b>Bond Angle</b> | <b>[deg]</b> |
|-------------------|--------------|
| N(2)-Cu(1)-N(1)   | 81.79        |
| N(3)-Cu(1)-O(1)   | 84.01        |
| N(3)-Cu(1)-N(2)   | 99.08        |
| O(1)-Cu(1)-N(1)   | 92.77        |
| N(1)-Cu(1)-O(1W)  | 96.63        |

**Table S3.** Selected bond lengths for complex **1b**.

| <b>Bond lengths</b> | <b>(Å)</b> |
|---------------------|------------|
| Cu(1)-O(1A)         | 1.937(3)   |
| Cu(1)-N(3A)         | 1.979(4)   |
| Cu(1)-N(1A)         | 1.995(4)   |

|             |          |
|-------------|----------|
| Cu(1)-N(2A) | 2.018(4) |
| Cu(1)-O(3A) | 2.307(5) |
| O(3A)-N(4A) | 1.253(6) |
| O(4A)-N(4A) | 1.249(7) |
| O(5A)-N(4A) | 1.244(7) |
| Cu(2)-O(1B) | 1.936(3) |
| Cu(2)-N(3B) | 1.984(4) |
| Cu(2)-N(1B) | 2.006(4) |
| Cu(2)-N(2B) | 2.020(4) |
| Cu(2)-O(3B) | 2.304(4) |
| O(3B)-N(4B) | 1.252(6) |
| O(4B)-N(4B) | 1.247(7) |
| O(5B)-N(4B) | 1.243(6) |

**Table S4.** Selected bond angles for complex **1b**.

| <b>Bond Angle</b> | <b>[deg]</b> |
|-------------------|--------------|
| O(1A)-Cu(1)-N(3A) | 84.59(17)    |
| O(1A)-Cu(1)-N(1A) | 92.57(16)    |
| N(3A)-Cu(1)-N(1A) | 173.5(2)     |
| O(1A)-Cu(1)-N(2A) | 165.44(19)   |
| N(3A)-Cu(1)-N(2A) | 98.75(17)    |
| N(1A)-Cu(1)-N(2A) | 82.57(17)    |
| O(1A)-Cu(1)-O(3A) | 95.33(18)    |
| N(3A)-Cu(1)-O(3A) | 99.13(18)    |
| N(1A)-Cu(1)-O(3A) | 86.99(17)    |
| N(2A)-Cu(1)-O(3A) | 98.11(17)    |
| O(1B)-Cu(2)-N(3B) | 84.13(15)    |
| O(1B)-Cu(2)-N(1B) | 92.76(16)    |
| N(3B)-Cu(2)-N(1B) | 175.63(19)   |
| O(1B)-Cu(2)-N(2B) | 165.54(19)   |
| N(3B)-Cu(2)-N(2B) | 100.03(16)   |
| N(1B)-Cu(2)-N(2B) | 82.25(17)    |
| O(1B)-Cu(2)-O(3B) | 94.14(19)    |
| N(3B)-Cu(2)-O(3B) | 97.09(16)    |
| N(1B)-Cu(2)-O(3B) | 86.18(16)    |
| N(2B)-Cu(2)-O(3B) | 99.03(17)    |

**Table S5.** Non-covalent interaction of complex **1b** with ct-DNA.

| <b>Name</b>                         | <b>Distance (Å)</b> | <b>Category</b> | <b>Type</b>          |
|-------------------------------------|---------------------|-----------------|----------------------|
| Complex <b>1b</b> :N4A - B:DA17:OP1 | 4.61                | Electrostatic   | Attractive Charge    |
| Complex <b>1b</b> :H11 - A:DC11:O2  | 2.62                | Hydrogen Bond   | Carbon Hydrogen Bond |
| A:DG12:OP1 - Complex <b>1b</b>      | 4.11                | Electrostatic   | Pi-Anion             |
| B:DG14 - Complex <b>1b</b> :C16     | 5.28                | Hydrophobic     | Pi-Alkyl             |

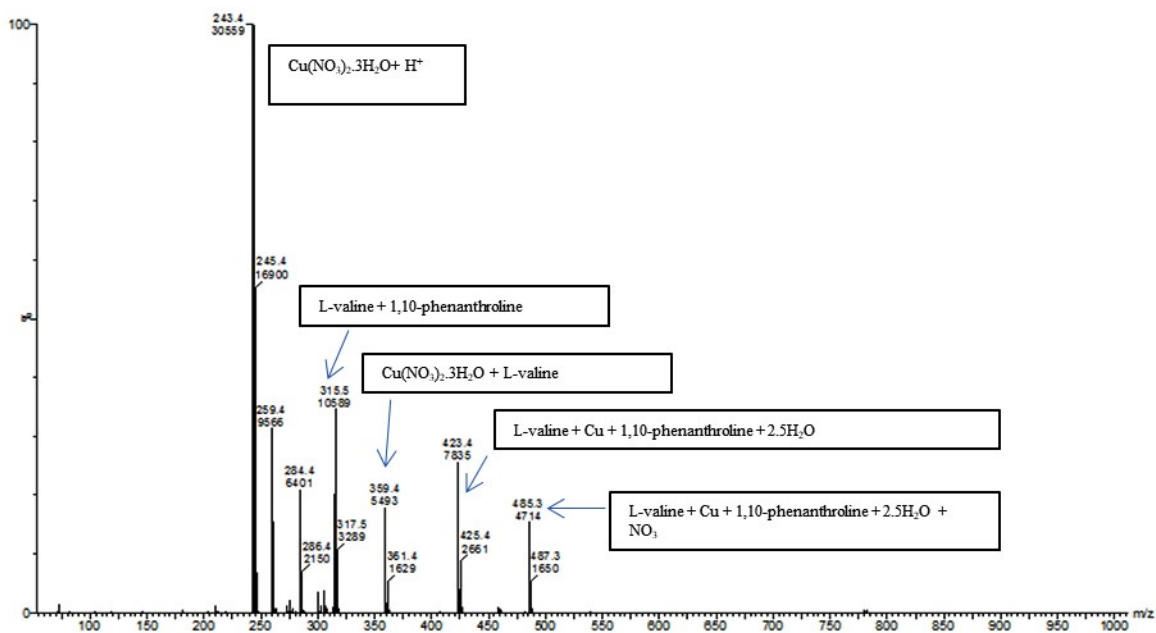

Fig. S1 ESI-MS spectrum of complex 1a.

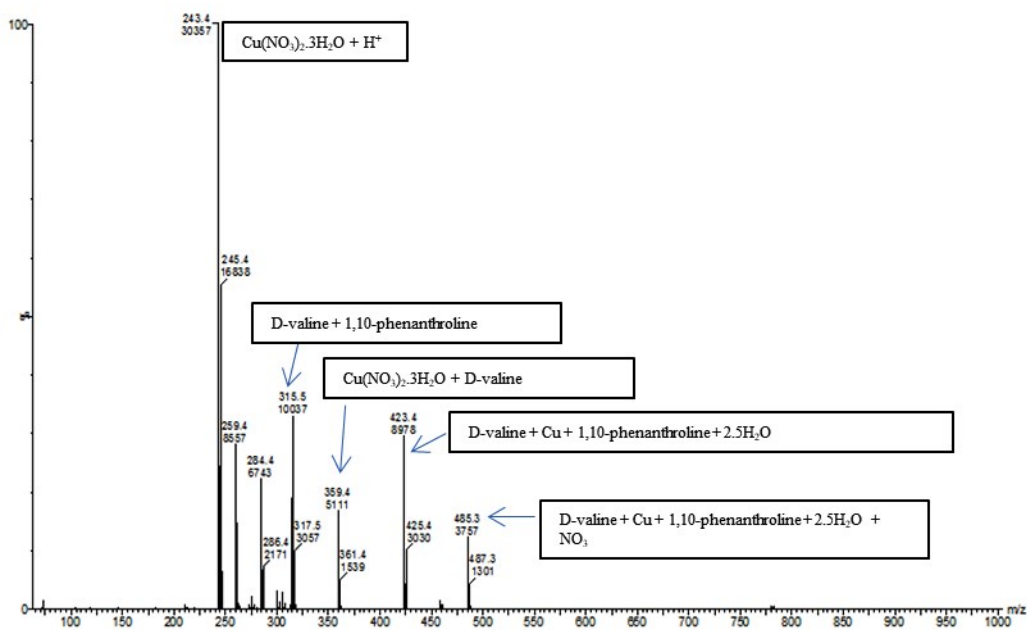

Fig. S2 ESI-MS spectrum of complex 1b.

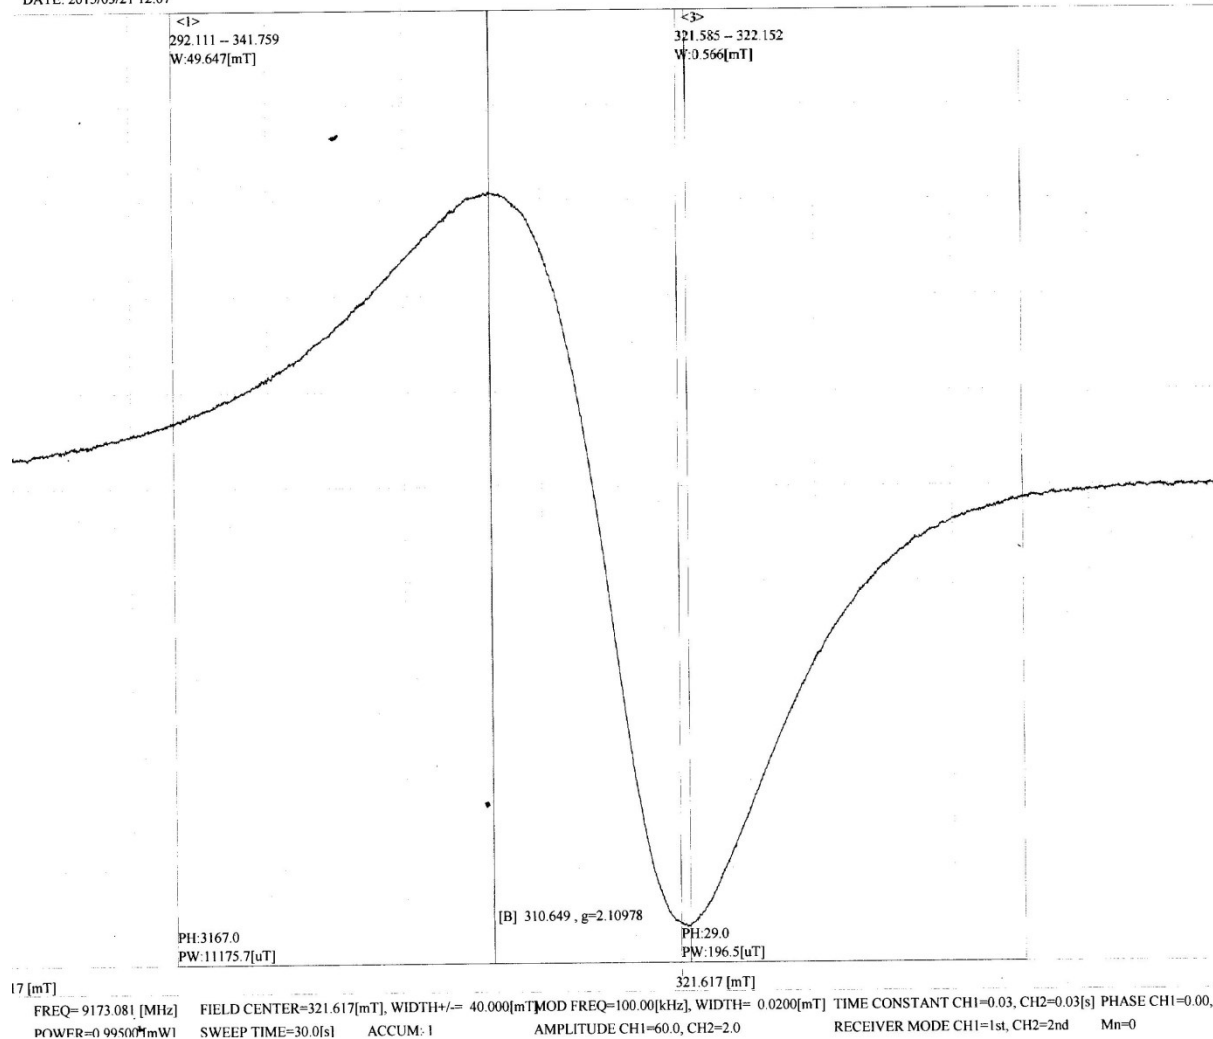

**Fig. S3(i)** X-band EPR spectrum of complex **1a** at RT.

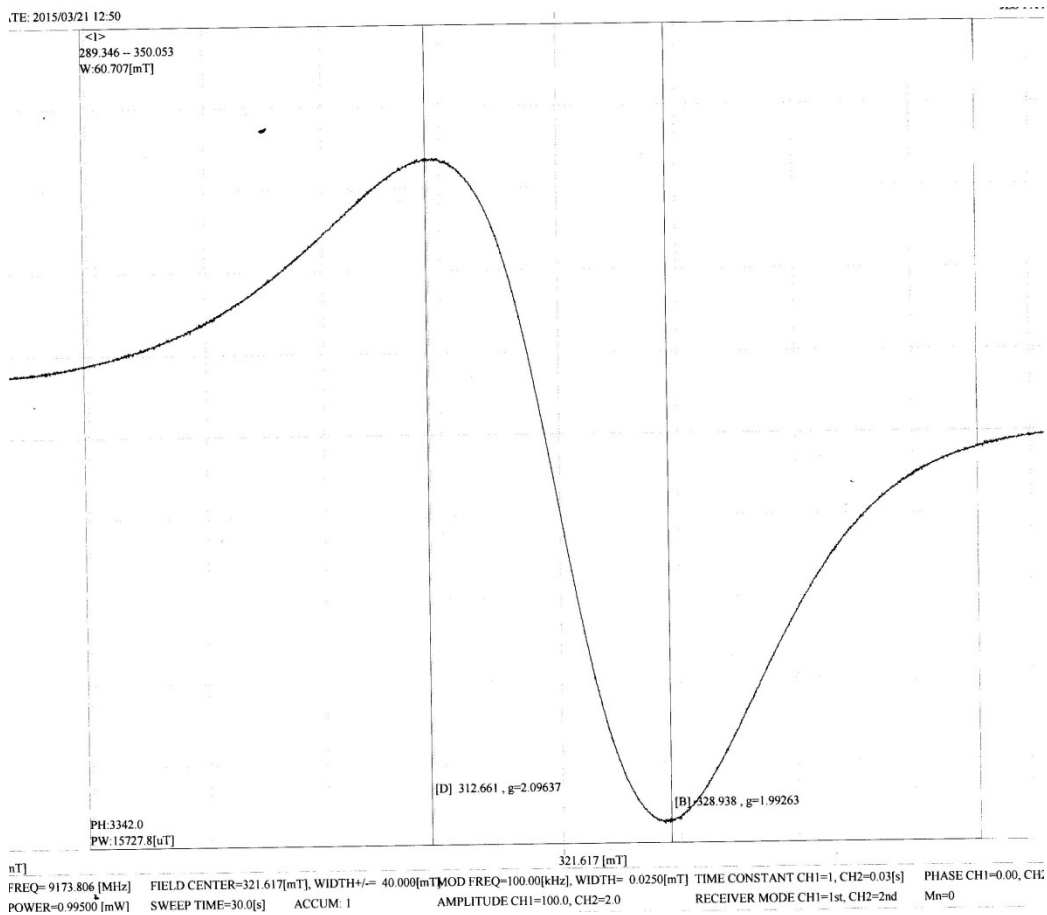

**Fig. S3(ii)** X-band EPR spectrum of complex **1b** at RT.

### ***In vitro* binding studies with ct-DNA**

The comparative spectra of solutions of complexes **1a** and **1b**, in the absence and presence of increasing concentrations of ct-DNA, were measured to obtain evidence for a probable binding mode. As shown in Fig. S4, following addition of increasing aliquots of ct-DNA ( $0.00\text{--}0.5 \times 10^{-4}$  M) to a fixed concentration of complexes **1a** and **1b** ( $0.2 \times 10^{-4}$  M), a ‘hypochromic effect’ was observed in the intra ligand band at 270 nm with a hypsochromic (blue) shift of 2 nm indicating that both complexes interacted with ct-DNA through intercalation mode of binding. The observed hypsochromic shift could be attributed to interaction of a  $\pi^*$  orbital of the intercalating ligand (1,10-phen) with a  $\pi$  orbital of the nucleic acid base pair. The differences in binding of L- and D-enantiomers revealed complex **1a** i.e. L-enantiomer exhibited better binding affinity than D-enantiomer.

Further, quantification of the binding strength of complexes **1a** and **1b** towards ct-DNA was ascertained by the intrinsic binding constant,  $K_b$  values were calculated by using the Wolfe–Shimer equation (1)

$$[\text{DNA}]/\varepsilon_a - \varepsilon_f = [\text{DNA}]/\varepsilon_b - \varepsilon_f + 1/K_b \mid \varepsilon_b - \varepsilon_f \mid \quad (1)$$

Where, [DNA] is ct-DNA concentration, and  $\varepsilon_a$ ,  $\varepsilon_f$  and  $\varepsilon_b$  are the apparent ( $A_{\text{abs}}/[\text{Cu(II) complex}]$ ), and free and bound complex extinction coefficients, respectively. A plot of  $[\text{DNA}]/(\varepsilon_a - \varepsilon_f)$  vs. [DNA] yields a slope of  $1/(\varepsilon_b - \varepsilon_f)$  and an intercept of  $1/[K_b(\varepsilon_b - \varepsilon_f)]$ , and  $K_b$  values are obtained from the ratio of the slope to the intercept. The intrinsic binding constant  $K_b$  values for the complexes **1a** and **1b** were found to  $2.48(\pm 0.11) \times 10^4$  and  $1.39(\pm 0.08) \times 10^4$   $\text{M}^{-1}$ , respectively.

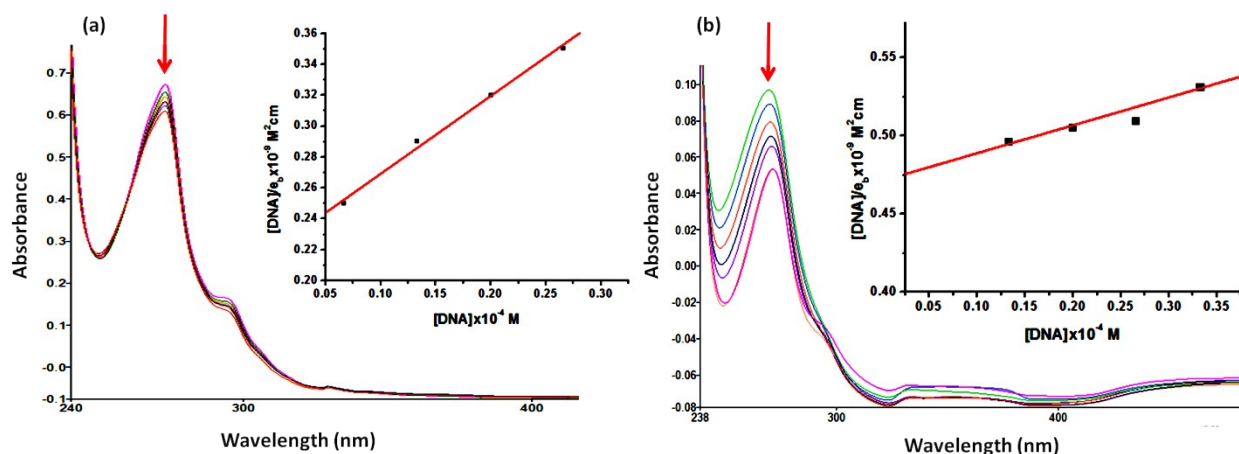

**Fig. S4** Absorption spectra of complexes **1a** and **1b** ( $0.2 \times 10^{-4}$  M) in the absence and presence of increasing amounts of ct-DNA ( $0.0-0.5 \times 10^{-4}$  M) in 5.0 mM Tris-HCl buffer at pH 7.2. Inset: Plots of  $[\text{DNA}]/\varepsilon_b$  ( $\text{M}^2 \text{cm}$ ) vs.  $[\text{DNA}]$  for titration with complexes **1a** and **1b**.

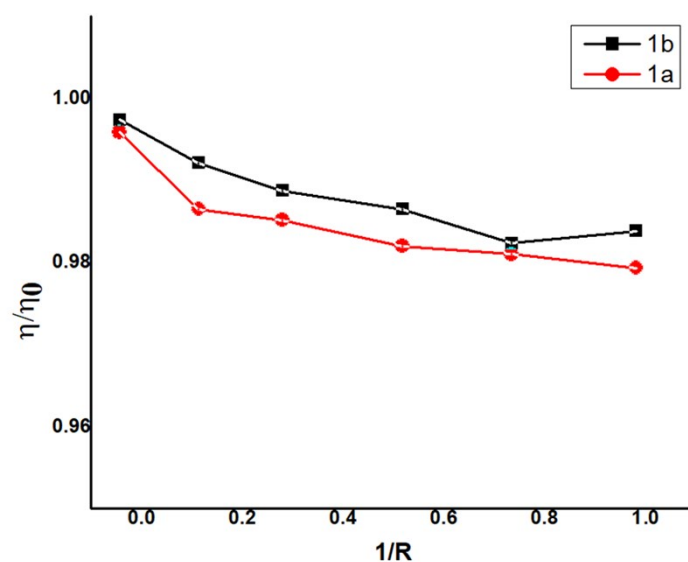

**Fig. S5** Effect of increasing amounts of complexes **1a** and **1b** on the relative viscosity ( $\eta/\eta_0$ ) of DNA in Tris-HCl buffer (pH 7.2).

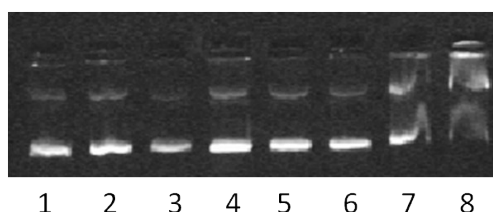

**Fig. S6** Cleavage of supercoiled pUC19 DNA ( $50 \mu\text{M}$ ) by complex **1a** ( $1 \mu\text{M}$ ) and **1b** ( $1 \mu\text{M}$ ) in a buffer containing 10 mM tris-HCl, pH = 7.4 at  $37^\circ\text{C}$ , for 30 min., Lane (1) DNA starting material; (2) DNA spontaneous reaction  $50 \mu\text{M}$ ; (3) asc ; (4) asc +  $\text{H}_2\text{O}_2$  (5) DNA +

**1a**; (6) DNA + **1b** (7) DNA+ asc+ H<sub>2</sub>O<sub>2</sub>+ **1a** (8) DNA+ asc+ H<sub>2</sub>O<sub>2</sub>+ **1b**; [asc] = 1 mM, [H<sub>2</sub>O<sub>2</sub>] = 1 mM

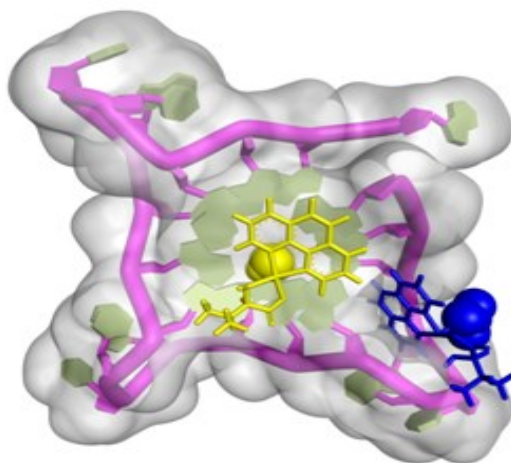

**Fig. S7** Top view of the docked pose of complex **1b** with parallel quadruplex G4 structure (PDB ID: 1KF1).
